# Supplementary material for: Proteomic Assessment of Extracellular Vesicles from Canine Tissue Explants as a Pipeline to Identify Molecular Targets in Osteosarcoma: PSMD14/Rpn11 as a Proof of Principle
Source: MDPI journal article supplement (doi:10.3390/ijms23063256), 2022-03-17
Supplement: s1 [file s1]

**Table S1.** Proteins elevated in OSA derived vesicles and their associations with metastasis, survival, and ALP levels in canine and human published datasets.

| Dataset                      | Metastasis         | Survival                   | ALP levels         |
|------------------------------|--------------------|----------------------------|--------------------|
| <b>GSE63476<br/>(Canine)</b> |                    |                            | RPLP0              |
|                              |                    |                            | RPS3               |
|                              |                    |                            | RPS9               |
|                              |                    |                            | RPL12              |
|                              |                    |                            | Ribosomal Combined |
|                              |                    |                            | PSMA7              |
|                              |                    |                            | PSMD14             |
| <b>GSE27217<br/>(Canine)</b> | PSMD14             | <b>PSMD14*</b>             |                    |
|                              | PSMA7              | <b>PSMA7*</b>              |                    |
|                              | PSMD14 & PSMA7     | <b>PSMD14 &amp; PSMA7*</b> |                    |
| <b>GSE32981<br/>(Human)</b>  | Ribosomal Combined |                            |                    |
|                              | RAN                |                            |                    |
|                              | EIF3S6IP           |                            |                    |
|                              | RSP3               |                            |                    |
|                              | RSP9               |                            |                    |
|                              | RPL12              |                            |                    |
|                              | <b>RPLP0*</b>      |                            |                    |
|                              | PSMD14             |                            |                    |
| <b>GSE14827<br/>(Human)</b>  | RPL0               |                            |                    |
|                              | Ribosomal Combined |                            |                    |
|                              | PSMA7              |                            |                    |
|                              | PSMD14             |                            |                    |
|                              | PSMD14 & PSMA7     |                            |                    |
| <b>GSE21257<br/>(Human)</b>  |                    | Ribosomal Combined         |                    |
|                              |                    | RPL90                      |                    |
|                              |                    | RAN                        |                    |
|                              |                    | EIF3S6IP                   |                    |
|                              | RPL0               | RPS3                       |                    |
|                              | PSMA7              | RPL12                      |                    |
|                              | <b>PSMD14*</b>     | ST13                       |                    |
|                              | PSMD14 & PSMA7     | RPL0                       |                    |
|                              |                    | PSMA7                      |                    |
|                              |                    | PSMD14                     |                    |
|                              |                    | PSMD14 & PSMA7             |                    |
| <b>GSE39058<br/>(Human)</b>  |                    | RPL0                       |                    |
|                              |                    | RAN                        |                    |
|                              |                    | EIF3L                      |                    |
|                              |                    | RSP3                       |                    |
|                              |                    | RSP9                       |                    |
|                              |                    | <b>ST13*</b>               |                    |
|                              |                    | RPL12                      |                    |
|                              |                    | Ribosomal Combined         |                    |
|                              |                    | PSMD14                     |                    |

\* Denotes significant differences were observed; "Ribosomal Combined" includes RPLP0, RPS3, RPS9, RPS12

**Table S2.** List of antibodies used in this study.

| Target         | Vendor                      | Catalog Number | Dilution for Immunoblotting |
|----------------|-----------------------------|----------------|-----------------------------|
| CD63           | Novus Biologicals           | NBP2-42225     | 1:1000                      |
| Flotillin-1    | BD Biosciences              | 610821         | 1:1000                      |
| Fibronectin    | Novus Biologicals           | NBP1-91258     | 1:1000                      |
| Filamin A      | Sigma                       | MAB1678        | 1:1000                      |
| Stomatin       | Abcam                       | ab166623       | 1:1000                      |
| Gelsolin       | Abcam                       | ab11081        | 1:1000                      |
| PARP           | Cell Signaling Technologies | 9542           | 1:1000                      |
| $\beta$ actin  | Cell Signaling Technologies | 4967           | 1:5000                      |
| PSMD14         | Abcam                       | ab109123       | 1:1000                      |
| HIF1 $\alpha$  | Novus Biologicals           | NB100-105      | 1:1000                      |
| NF- $\kappa$ B | Cell Signaling Technologies | 8242           | 1:1000                      |
| Ubiquitin      | Enzo Life Sciences          | ADI-SPA-200    | 1:1000                      |
